# Supplementary material for: TBP, PPIA, YWHAZ and EF1A1 Are the Most Stably Expressed Genes during Osteogenic Differentiation
Source: MDPI journal article supplement (doi:10.3390/ijms23084257), 2022-04-12
Supplement: s1 [file s1]

Supplementary material

Selection of reference genes for RT-qPCR expression analysis in commonly used human cell lines of osteogenic origin

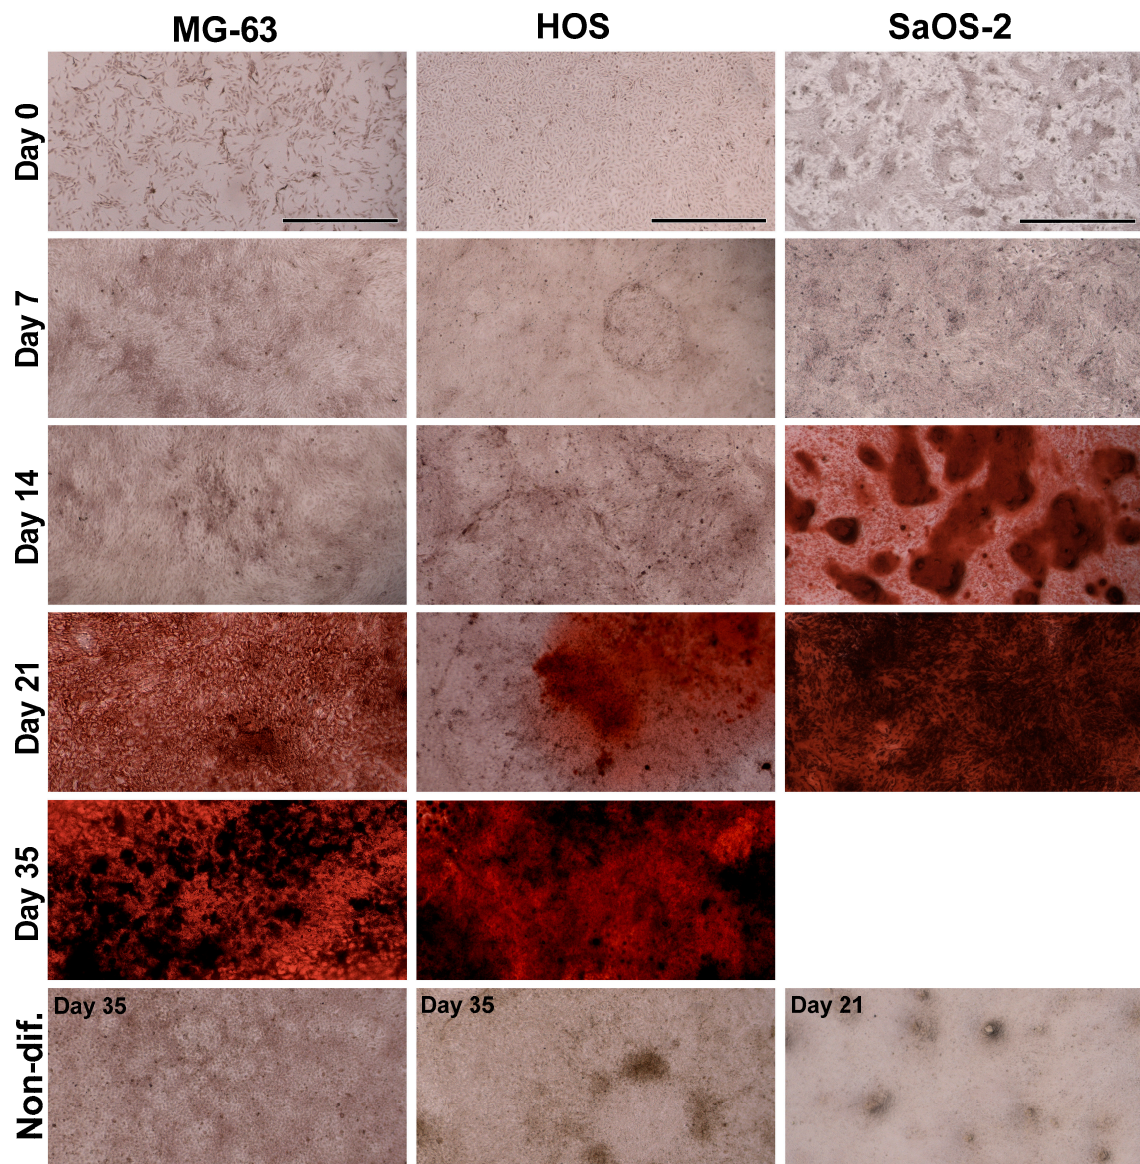

**Figure S1:** Photographs of Alizarin Red S stained cells at each 7<sup>th</sup> day of differentiation. Scale bars are set to 1 mm.

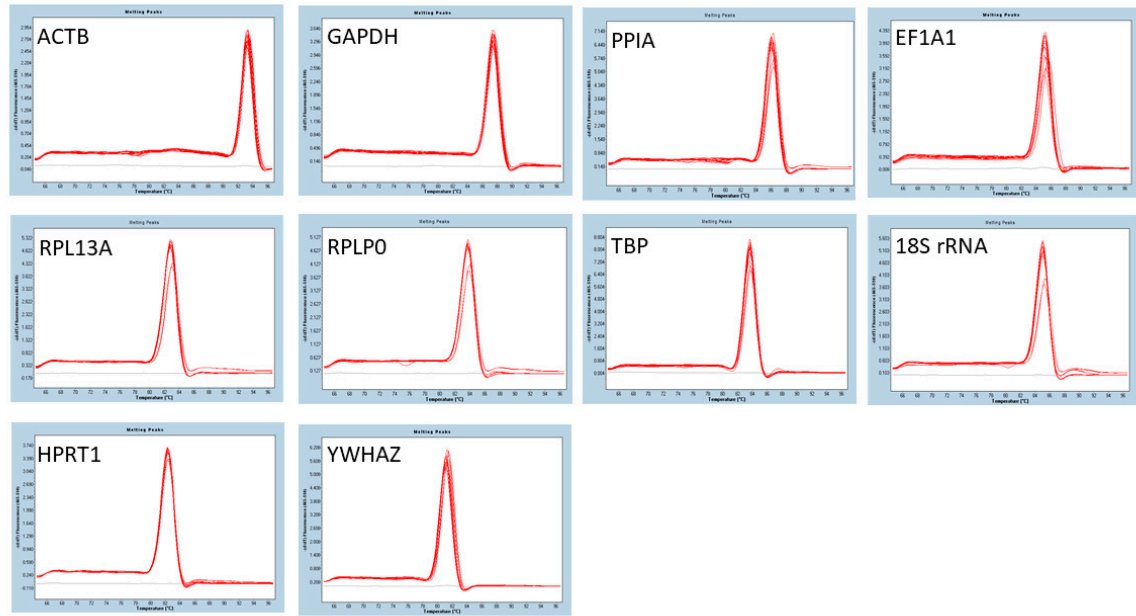

**Figure S2:** Primer specificity was checked by melting curves. Single curve confirms that only one product is formed. Non-treated controls are shown in grey.

**Table S1:** Comprehensive ranking by NormFinder.

| rank | overall ranking  |                 |
|------|------------------|-----------------|
|      | Gene             | Stability value |
| -    | Best combination | 0.038           |
| 1    | GAPDH & EF1A1    | 0.066           |
| 2    | GAPDH            | 0.076           |
| 3    | PPIA             | 0.081           |
| 4    | EF1A1            | 0.081           |
| 5    | TBP              | 0.101           |
| 6    | YWHAZ            | 0.116           |
| 7    | ACTB             | 0.121           |
| 8    | RPLP13A          | 0.123           |
| 9    | HPRT1            | 0.153           |
| 10   | RPLP0            | 0.171           |
|      | 18s rRNA         |                 |

**Table S2:** Overall comprehensive ranking by geometrical mean of candidate reference genes by multiple studies .

| cell type          | MG-63      | HOS        | SaOS-2     | mouse<br>MC3T3-E1 | rat MSC | ovine MSC | hiPSC | hBM-MSC<br>(2D culture) | hBM-MSC | hBM-MSC | /        | /                |
|--------------------|------------|------------|------------|-------------------|---------|-----------|-------|-------------------------|---------|---------|----------|------------------|
| study<br>reference | this study | this study | this study | (20)              | (21)    | (27)      | (22)  | (12)                    | (13)    | (14)    | /        | /                |
| name               | rank       | rank       | rank       | rank              | rank    | rank      | rank  | rank                    | rank    | rank    | geo-mean | final<br>ranking |
| 18S rRNA           | 8          | 8          | 10         | 5                 | -       | -         | -     | 7                       | 4       | 7       | 6.733    | 9                |
| ACTB               | 10         | 9          | 9          | 1                 | 26      | 11        | 11    | -                       | 7       | 9       | 8.161    | 10               |
| EF1A1              | 5          | 2          | 3          | -                 | -       | -         | -     | -                       | 3       | 8       | 3.728    | 4                |
| GAPDH              | 3          | 6          | 5          | 4                 | -       | 4         | 5     | 2                       | 6       | 5       | 4.228    | 5                |
| HPRT1              | 7          | 3          | 7          | 3                 | 7       | 9         | 12    | -                       | -       | 1       | 4.902    | 8                |
| PPIA               | 2          | 7          | 2          | -                 | 5       | -         | -     | 3                       | -       | 2       | 3.072    | 1                |
| RPL13A             | 6          | 5          | 8          | -                 | -       | -         | 7     | -                       | 1       | -       | 4.416    | 6                |
| RPLP0              | 9          | 10         | 4          | -                 | -       | -         | -     | 1                       | -       | 4       | 4.282    | 7                |
| TBP                | 1          | 4          | 6          | -                 | 8       | -         | 1     | 4                       | -       | 6       | 3.337    | 2                |
| YWHAZ              | 4          | 1          | 1          | -                 | 4       | 5         | 10    | 8                       | 5       | 2       | 3.420    | 3                |
